# Supplementary material for: Changes of Plasma Amino Acid Profiles in Infants With a Nutrient-Fortified Complementary Food Supplement: Evidence From a 12-Month Single-Blind Cluster-Randomized Controlled Trial
Source: Front Nutr. 2021 Sep 30;8:606002. doi: 10.3389/fnut.2021.606002 (PMC8514778; doi:10.3389/fnut.2021.606002)
Supplement: Supplementary file 2 [file Table_2.xlsx]

## Sheet: Supplementary Table 2
	Supplementary Table 2 | Raw plasma amino acids concentration in each time point
		Baseline																		Midpoint																		End point
		Plasma concentrationa												Pb						Plasma concentrationa												Pb						Plasma concentrationa
	Amino acids	KP				MN				NE				KP vs MN		KP vs NE		MN vs NE		KP				MN				NE				KP vs MN		KP vs NE		MN vs NE		KP				MN				NE
	Lysine	118.558	±	29.6611		122.139	±	30.2184		120.537	±	32.5596		0.350951		0.734887		0.812439		121.22	±	34.5823		112.943	±	32.2886		115.05	±	34.6754		0.0176043		0.11636		0.767744		111.922	±	41.8648		108.35	±	37.8675		107.623	±	40.4411
	Valine	132.294	±	29.1242		134.611	±	27.6859		137.256	±	31.8844		0.620217		0.124067		0.541209		145.816	±	35.3679		134.905	±	32.3487		144.709	±	34.1276		< 0.001		0.931775		0.00364996		149.771	±	36.7328		141.966	±	37.4606		153.295	±	40.0803
	Leucine	84.9942	±	20.3555		87.4685	±	19.6265		88.7818	±	22.5817		0.335749		0.0872148		0.737409		87.9936	±	25.2265		80.0372	±	23.399		88.1332	±	24.5784		< 0.001		0.99783		< 0.001		85.9812	±	25.5961		80.49	±	26.265		89.6118	±	28.3321
	Isoleucine	46.0346	±	11.7578		47.5832	±	11.5435		48.1823	±	13.104		0.283211		0.0985083		0.829198		49.1954	±	14.1873		43.762	±	11.9968		47.6801	±	13.2086		< 0.001		0.415175		0.00253807		47.3489	±	14.8047		43.4042	±	14.1913		47.2611	±	15.8206
	Phenylalanine	36.7222	±	9.40591		37.2145	±	9.55516		37.9408	±	10.5265		0.822586		0.318712		0.657678		45.8487	±	10.8847		43.5161	±	13.8137		45.5222	±	11.9726		0.0857665		0.954615		0.163541		48.2695	±	11.753		45.5812	±	12.8492		50.7073	±	15.005
	Tryptophan	33.5606	±	10.7171		35.9852	±	11.7403		33.8702	±	11.0621		0.027455		0.9444		0.0665031		40.232	±	12.8576		37.4015	±	13.5016		37.4197	±	13.5072		0.0450276		0.0544461		0.999872		28.7635	±	13.4106		27.9568	±	12.5116		30.169	±	14.6465
	Threonine	100.632	±	31.4256		98.9839	±	28.3981		102.22	±	32.5269		0.799919		0.819426		0.428691		86.953	±	30.6178		77.5098	±	28.7819		86.622	±	32.4576		0.00162429		0.992271		0.00259763		78.1548	±	32.0866		73.4404	±	29.0541		78.1841	±	35.7425
	Histidine	58.8998	±	11.8173		60.5939	±	11.2436		59.7008	±	12.5973		0.207483		0.712091		0.64809		66.0692	±	13.859		62.3975	±	13.6781		64.4156	±	13.703		0.0078756		0.384855		0.22833		63.0261	±	14.7964		62.6784	±	14.2701		64.7237	±	15.3507
	Methionine	17.5943	±	5.2345		17.8812	±	4.94512		17.3955	±	5.17398		0.782851		0.89325		0.501209		18.29	±	4.76455		17.156	±	4.29557		18.1022	±	4.76184		0.0160405		0.895557		0.056413		17.013	±	4.73966		16.7403	±	5.2263		17.1209	±	5.68843
	BCAA	263.323	±	58.7008		269.662	±	56.6165		274.22	±	65.1348		0.422214		0.0882782		0.643642		283.005	±	71.1687		258.704	±	63.7257		280.522	±	67.7192		< 0.001		0.9142		< 0.001		283.101	±	71.8562		265.86	±	72.3268		290.168	±	78.8182
	EAA	629.29	±	128.503		642.46	±	123.705		645.884	±	140.294		0.45513		0.302019		0.948667		662.574	±	142.376		610.043	±	134.513		648.924	±	146.852		< 0.001		0.544993		0.0065359		629.171	±	155.285		601.614	±	148.223		640.197	±	166.119
	a Plasma amino acid concentrations were expressed as means ± SDs [μM]. b P-values show results of the Tukey-Kramer multiple comparison test. Bold text indicates a statistically significant difference between groups with a p-value less than 0.05. B, Baseline; M, Midpoint; E, End point; KP, KOKO Plus ; MN, Micronutrient ; NE, Nutrition Education ; BCAA, Branch chain amino acid; EAA, Essential amino…
[truncated: 3 more columns]
